# Supplementary material for: SOCS2-enhanced ubiquitination of SLC7A11 promotes ferroptosis and radiosensitization in hepatocellular carcinoma
Source: PubMed Central journal article supplement (PMC9883449; doi:10.1038/s41418-022-01051-7), 2022-08-22
Supplement: 41418_2022_1051_MOESM7_ESM.pdf [file 41418_2022_1051_MOESM7_ESM.pdf]

## Sequence alignment results of SLC7A11 proteins in different species based on clustalw tool

### Header line description

**A:Sequence number B:Accession number(NP/XP) C:Amino acid number**

**D:Species E:Amino acid sequence**

**Underlined: Amino acid sequence of human-derived SLC7A11 protein**

**Yellow marker: 7 lysine sites susceptible to ubiquitination**

| A            | B              | C      | D                    |
|--------------|----------------|--------|----------------------|
| Sequence 1:  | NP_055146.1    | 501 aa | human                |
| Sequence 2:  | NP_036120.1    | 502 aa | house mouse          |
| Sequence 3:  | NP_001101143.2 | 502 aa | Norway rat           |
| Sequence 4:  | XP_009289503.1 | 498 aa | zebrafish            |
| Sequence 5:  | NP_001239111.1 | 491 aa | sheep                |
| Sequence 6:  | XP_021385250.1 | 503 aa | Bengalese finch      |
| Sequence 7:  | XP_024833346.1 | 503 aa | cattle               |
| Sequence 8:  | XP_002932094.2 | 500 aa | tropical clawed frog |
| Sequence 9:  | XP_008265658.1 | 502 aa | rabbit               |
| Sequence 10: | NP_001253220.1 | 501 aa | Rhesus monkey        |
| Sequence 11: | NP_001288791.1 | 527 aa | dog                  |
| Sequence 12: | XP_001136486.1 | 501 aa | chimpanzee           |
| Sequence 13: | XP_426289.3    | 501 aa | chicken              |
| Sequence 14: | XP_035310922.1 | 502 aa | Chinese hamster      |
| Sequence 15: | XP_005607903.1 | 503 aa | horse                |
| Sequence 16: | XP_020957246.1 | 502 aa | pig                  |
| Sequence 17: | XP_044286854.1 | 503 aa | Komodo dragon        |
| Sequence 18: | XP_039607615.1 | 498 aa | gray bichir          |
| Sequence 19: | XP_044911795.1 | 489 aa | domestic cat         |
| Sequence 20: | NP_001305270.1 | 503 aa | alpaca               |

| B                  | E                                                                   |
|--------------------|---------------------------------------------------------------------|
| NP_036120.1        | MVRKPVVATISKGGYLQGNMSGRLPSMGDQEPGQEKVVLKKKITLLRGVSIIGTVIGS          |
| NP_001101143.2     | MVRKPVVATISKGGYLQGNVSGRLPSVGDQEPGHEKVVLKKKITLLRGVSIIGTVIGS          |
| XP_035310922.1     | MVRKPVVTTISKGGYLQGNVSGRLPSMGDQEAPGQEKVVLKKKITLLRGVSIIGTVIGS         |
| <u>NP_055146.1</u> | <u>MVRKPVVSTISKGGYLQGNVNGRLPSLGNKEPPGQEKVQLKRVKVTLLRGVSIIGTIIGA</u> |
| XP_001136486.1     | MVRKPVVSTISKGGYLQGNVNGRLPSLGNKEPPGQEKVQLKRVKVTLLRGVSIIGTIIGA        |
| NP_001253220.1     | MVRKPVVSTISKGGYLQGNVNRRLPSLGNKEPPGQEKVQLKRVKVTLLRGVSIIGTIIGA        |
| NP_001288791.1     | MVRKPVVSTISSGGYLQGNVNGKLPGLGKKEPPGQEKVVLKKKITLVRGISIIGTIIGA         |
| XP_044911795.1     | MVRKPVVSTISSGGYLQGNVNGKLPGLGKKEPPGQEKVVLKKKITLVRGISIIGTIIGA         |
| XP_005607903.1     | MVRKPVVSTISNGGYLQGNVNGRLPSLGSKEPPEQEKVVLKKKITLVRGISIIGTIIGA         |
| NP_001239111.1     | MVRKPVVSTISNGAYLQGSVNGRLPAPGGKKEPPGQEKVVLKKKITLVRGISIIGTIIGA        |
| XP_024833346.1     | MVRKPVVSTISSGAYLQGSVNGRLPALGGREPPGQEKVVLKKKITLVRGISIIGTIIGA         |
| XP_020957246.1     | MVRKPVVSTISNGGYLQGNVHRRRLPSLGGREPPGQEKVVLKKKITLVRGISIIGTIIGA        |
| NP_001305270.1     | MVRKPVVSTISNGGYLQGNVHGRLPSLGSKEPPGQERVVLKKKITLVRGISIIGTIIGA         |
| XP_008265658.1     | MVRKPVVSTISKRSYLQGNVNGRLPSMGKKEPPGQEKVVLKKKITLVRGISIIGTIIGA         |
| XP_021385250.1     | MFRKAAVPTVSNQSYLQGRANGKLSMDSGQPAREGKVVVLKKKVTLLRGVSIIGTIIGA         |
| XP_426289.3        | MVRKAAVTVPNGSYLQGPNGRLPSMDSRQPQE--KVVVLKKKVTLLRGVSIIGTIIGA          |



NP\_036120.1 STSVSWSARIQIFLTFCKLTAILIIIVPGVIQLIKGQTHHFKDAFSGRDTSLMGLPLAFY  
NP\_001101143.2 STSVSWSARIQIFLTFCKLTAILIIIVPGVIQLIKGQTHHFKDAFSGRDTNLMGLPLAFY  
XP\_035310922.1 SMSVSWASARIQIFLTFCKLTAILIIIVPGVIQLIKGHTQHFKDAFSGRDANLMGLPLAFY  
NP\_055146.1 SMSVSWASARIQIFLTFCKLTAILIIIVPGVMQLIKGQTONFKDAFSGRDSSITRLPLAFY  
XP\_001136486.1 SMSVSWASARIQIFLTFCKLTAILIIIVPGVMQLIKGQTONFKDAFSGRDSSITRLPLAFY  
NP\_001253220.1 SMSVSWASARIQIFLTFCKLTAILIIIVPGVMQLIKGQTONFKDAFSGRDSSITRLPLAFY  
NP\_001288791.1 SMSVSWASARIQIFLTFCKLTAILIIIVPGVMQLIKGQTONFKDAFSGRANIMGLPLAFY  
XP\_044911795.1 SMSVSWASARIQIFLTFCKLTAILIIIVPGVMQLIKGQTONFKDAFSGRDASIMGLPLAFY  
XP\_005607903.1 SMSVSWASARIQIFLTFCKLTAIVIIIVPGVMQLIKGQTONFKDAFSGRDANIMGLPLAFY  
NP\_001239111.1 SMSVSWASARIQIFLTFCKLTAILIIIVPGVMQLIKGKHSILKMPFQEMQVLWGCHWLF  
XP\_024833346.1 SMSVSWASARIQIFLTFCKLTAILIIIVPGVMQLIKGQTONFKDAFSGRDASIMGLPLAFY  
XP\_020957246.1 SMSVSWASARIQIFLTFCKLTAILIIIVPGVIQLIKGQTONFKDAFSGRNEIMGLPLAFY  
NP\_001305270.1 SMSVSWASARIQIFLTFCKLTAILIIIVPGVMQLIKGQTONFKDAFSGRDASIMGLPLAFY  
XP\_008265658.1 SMSVSWASARIQIFLTFCKLTAILIIIVPGVMQLIKGQTONFKDAFSGRDASVMGLPLAFY  
XP\_021385250.1 STSVSWSARIQMFLTFCKLVAILIIIVPGVIQLIKGETQHFKNAFAGNDASIMGLPLAFY  
XP\_426289.3 STSVSWSARIQIFLTFCKLVAILIIIVPGVIQLIKGETQHFKNAFSGNDASIMGLPLAFY  
XP\_044286854.1 SMSVSWSTRIQIFLTFCKLIAILIIIVPGVMQLIKGENQHFKDAFVGNAASVKGLPLAFY  
XP\_002932094.2 SVSVSWSARIQIFLTFCKLIAILIIIVPGVLQLIKGETQONFKDAFIGKDVSMGLPLAFY  
XP\_009289503.1 SMSVSWTARLQIFLTFCKLIAIAIIIVPGLYQLFKGETKNFENAFEVNTAQLTGLPLAFY  
XP\_039607615.1 SMSVSWASARIQIFLTFCKLLAMLIIIVPGLFQLFKGETQONFHNAFGVNEVPVMGLPLAFY  
\* \*\*\*\*:.\*:.\*:\*\*\*\*.\* \* : \*\*.\*: \*\*:\* . : . \* . : \*

NP\_036120.1 YGMAYAGWFYLNFTITEVDNPEKTIPLAICISMAIITVGYVLTNAVYFTTISAEELLQS  
NP\_001101143.2 YGMAYAGWFYLNFTITEVDNPEKTIPLAICISMAIITVGYVLTNAVYFTTISAEELLQS  
XP\_035310922.1 YGMAYAGWFYLNFTITEVENPEKNIPLAICISMAIITVGYVLTNAVYFTTISAEELLS  
NP\_055146.1 YGMAYAGWFYLVNFTITEVENPEKTIPLAICISMAIIVTIGYVLTNAVYFTTINAEELLS  
XP\_001136486.1 YGMAYAGWFYLVNFTITEVENPEKTIPLAICISMAIIVTIGYVLTNAVYFTTINAEELLS  
NP\_001253220.1 YGMAYAGWFYLVNFTITEVENPEKTIPLAICISMAIIVTIGYVLTNAVYFTTINAEELLS  
NP\_001288791.1 YGMAYAGWFYLVNFTITEVENPEKTIPLAICISMAIIVTIGYVLTNAVYFTTISAEELLS  
XP\_044911795.1 YGMAYAGWFYLVNFTITEVENPEKTIPLAICISMAIIVTIGYVLTNAVYFTTISAEELLS  
XP\_005607903.1 YGMAYAGWFYLVNFTITEVENPEKTIPLAICISMAIIVTIGYVLTNAVYFTTISAEELLS  
NP\_001239111.1 MECMRTPAGFYLVNFTITEVENPEKTIPLAICISMTVVTVGYVLTNAVYFTTISAEELMS  
XP\_024833346.1 YGMAYAGWFYLVNFTITEVENPEKTIPLAICISMAIIVTIGYVLTNAVYFTTISAEELMS  
XP\_020957246.1 YGMAYAGWFYLVNFTITEVENPEKTIPLAICISMAIIVTIGYVLTNAVYFTTISAEELLS  
NP\_001305270.1 YGMAYAGWFYLVNFTITEVENPEKTIPLAICISMAIIVTIGYVLTNAVYFTTISAEELLS  
XP\_008265658.1 YGMAYAGWFYLVNFTITEVENPERTVPLAICISMAIIVTIGYVLTNAVYFTTISAEELLS  
XP\_021385250.1 SGMAYAGWFYLVNFTITEVENPEKNIPLAICISMAIIVTIGYVLTNAVYFTTISAGELLS  
XP\_426289.3 SGMAYAGWFYLVNFTITEVENPEKNIPLAICISMAIIVTIGYVLTNAVYFTTISAGELLS  
XP\_044286854.1 SGMAYAGWFYLVNFTITEVENPERNVPLAICTSMVIVTVGYVLTNAVYFTTISPEELMS  
XP\_002932094.2 SGMAYAGWFYLVNFTITEVENPEKNVPLAICISMAIIVTIGYVLTNAVYFTTISAEELVLS  
XP\_009289503.1 SGMAYAGWFYLVNFTITEVENPERTVPLAICISMAIIVMICYTLTNVAYYTVMSADELLAS  
XP\_039607615.1 SGMAYAGWFYLVNFTITEVENPEKTVPLAICISMAIIVTFSYVLINVAAYAVLTADEMPLAS  
. . \*\*\*\*\*:\*\*\*\*\*:\*\*\*\*\*:.\*:\*\*\*\*\* \*\* :: \*. \* \*\*\*\*\*:..... \*:: \*

NP\_036120.1 SAVAVTFSERLLGKFLAVPIFVALSCFGSMNGGVFAVSRLFYVASREGHLPEILSMIHV  
NP\_001101143.2 SAVAVTFSERLLGKFLAVPIFVALSCFGSMNGGVFAVSRLFYVASREGHLPEILSMIHV  
XP\_035310922.1 NAVAVTFSERLLGNFLAVPIFVALSCFGSMNGGVFAVSRLFYVASREGHLPEILSMIHV  
NP\_055146.1 NAVAVTFSERLLGNFLAVPIFVALSCFGSMNGGVFAVSRLFYVASREGHLPEILSMIHV  
XP\_001136486.1 NAVAVTFSERLLGNFLAVPIFVALSCFGSMNGGVFAVSRLFYVASREGHLPEILSMIHV  
NP\_001253220.1 NAVAVTFSERLLGNFLAVPIFVALSCFGSMNGGVFAVSRLFYVASREGHLPEILSMIHV



|                |                                                              |
|----------------|--------------------------------------------------------------|
| NP_001305270.1 | FKVPLFIPALFSFTCLFMVALSLYSDPFSTGIGFIITLTGVPAYYLFIIWDKKPKWFRRM |
| XP_008265658.1 | FKVPLFIPALFSFTCFMVALSLYSDPFSTGIGFVITLSGVPAYYLFIIWDKKPKWFRRM  |
| XP_021385250.1 | FKVPLFIPALFSFTCLFMVALSLYSDPVNTGIGFAITLTGIPAYYFFIVWDNKPWFRRKL |
| XP_426289.3    | FKVPLFIPALFSFTCLFMVALSLYSDPVNTGIGFAITLTGVPAYYLFIVWDKKPKWFRKL |
| XP_044286854.1 | FKVPLFIPALFSFTCLFMVLSLYADPVNTGIGFAITLTGVPAYYLFIIWDKKPTWFRRF  |
| XP_002932094.2 | FKVPIFIPALFSFTCLFMVALSLYSDPINTGIGFAITLTGVPAYYLFIVWDNKPWFRTF  |
| XP_009289503.1 | FKVPIFIPAVFSFTCFMVFSLYSDPINTGIGFAISLTGIPAYYIFIHSCRKPKWFQKF   |
| XP_039607615.1 | FKVPLFIPALFCFSCFLMVGLSLYSDPINTGIGFGITLTGIPAYYIFIVWNKKPKIIQKF |

\*\*\*\*:\*\*\*\*:\*.\*:\*:\*: \* \*\*\*:\*\*..\*\*:\* \*:\*:\*:\*\*\*\*:\*. .\*\*\* :: :

|                    |                                                |
|--------------------|------------------------------------------------|
| NP_036120.1        | SDRITRTLQIILEVVPEDSKEL-----                    |
| NP_001101143.2     | SDRITRTLQIILEVVPEDSKEL-----                    |
| XP_035310922.1     | SERITRTLQIILEVVPEDSKEL-----                    |
| <u>NP_055146.1</u> | <u>SEKITRTLQIILEVVPEDDKL-----</u>              |
| XP_001136486.1     | SEKITRTLQIILEVVPEDDKL-----                     |
| NP_001253220.1     | SERITRTLQIILEVVPEDDKL-----                     |
| NP_001288791.1     | SGKTFTQFWDLLRDRVIENPVYGYTQPHHTHTHPLMFNNVSKATAH |
| XP_044911795.1     | SERTTSNDP-----                                 |
| XP_005607903.1     | SDRITRTLQIILEVVPEDCHKL-----                    |
| NP_001239111.1     | SDITRTLQIILEVVPEDCHKL-----                     |
| XP_024833346.1     | SDMITRTLQIILEVVPEDCHKL-----                    |
| XP_020957246.1     | SDRITRTLQIILEVVPEDCHK-----                     |
| NP_001305270.1     | SDKITRTLQIILEVVPEDCQKL-----                    |
| XP_008265658.1     | SDTITRTLQIILEVVPEDCRK-----                     |
| XP_021385250.1     | LGRVTTTLQILLEVIPAEDQKS-----                    |
| XP_426289.3        | LDTVTEALQILLEVVPSEEDQKS-----                   |
| XP_044286854.1     | LGRITSMQLIILEVVPAAENPRS-----                   |
| XP_002932094.2     | TDRTTLMQLIILEVAPTDKNIS-----                    |
| XP_009289503.1     | SDSMNRSQILLEVVPAAEH-----                       |
| XP_039607615.1     | TDSTRTLQIILEVVSPE-----                         |
